# Supplementary material for: A coarse-grained computational model of the nuclear pore complex predicts Phe-Gly nucleoporin dynamics
Source: PubMed Central journal article supplement — J Gen Physiol. 2017 Oct 2;149(10):951–66. doi: 10.1085/jgp.201711769 (PMC5694938; doi:10.1085/jgp.201711769), 2017-10-02
Supplement: JGP_201711769_sm.pdf [file JGP_201711769_sm.pdf]

## SUPPLEMENTAL MATERIAL

Pulupa et al., <https://doi.org/10.1085/jgp.201711769>

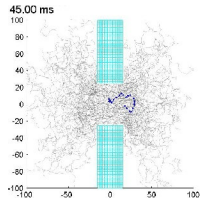

Video 1. **Single filaments translocate across the NPC.** Movement of a single FG-Nup49 filament across the NPC in the absence of FG-FG bonds; all axes are in nanometers.
